# Supplementary material for: Genome-wide identification and expression analysis of the WRKY gene family in Sophora flavescens during tissue development and salt stress
Source: Front Plant Sci. 2024 Dec 23;15:1520786. doi: 10.3389/fpls.2024.1520786 (PMC11700743; doi:10.3389/fpls.2024.1520786)
Supplement: Supplementary Table 1 — Primer sequences used for RT-qPCR. [file Table1.xlsx]

## Sheet: Sheet1
NO.	ID	Primer	5' to 3'
1	Sfla_1G0607200	SfWRKY03-qF1	CGTGCTAGTAGTGGTGGAGGA
		SfWRKY03-qR1	TCAGTTGAAGGGAAGTGATGC
2	Sfla_2G0290600	SfWRKY11-qF1	AAGAGGTTCCAATTCAGGGAG
		SfWRKY11-qR1	AAGGGATCGGAGAAGCAGTAG
3	Sfla_3G0051700	SfWRKY16-qF1	AAGTTGCTGACGTGGCTGTTT
		SfWRKY16-qR1	TGTGGTGTTCCGAAGTTTGTT
4	Sfla_3G0647500	SfWRKY18-qF1	CTCTAGCCGTTGTCATTGTTC
		SfWRKY18-qR1	GGTTTCTGTCCGTATTTCCTC
5	Sfla_4G0543900	SfWRKY26-qF2	GCACCCAAGCTAGTCATGTAA
		SfWRKY26-qR2	TTCTGAAGTGGCTGGTGATAT
6	Sfla_4G0593700	SfWRKY29-qF2	CTATGACAAAGCTGTGAAGGGTA
		SfWRKY29-qR2	ATCCAAAGAGGAGCGAAGAAG
7	Sfla_4G0262500	SfWRKY30-qF1	CATCCTAAGCCTCAGTCTACTA
		SfWRKY30-qR1	TTCATCATACTCATCTCCTCC
8	Sfla_5G0081500	SfWRKY35-qF2	GGTCCAAACCAGGTCTATCAA
		SfWRKY35-qR2	TTAACTTTCTTCTGGCGTCCA
9	Sfla_5G0419900	SfWRKY37-qF2	CGAGTGTTGTGGGAAGCT
		SfWRKY37-qR2	TCATTACCTGAACCACCTATCT
10	Sfla_5G0464900	SfWRKY38-qF1	GAAGCACCATCACCCAAGA
		SfWRKY38-qR1	AGGCCCATGAATCAGACG
11	Sfla_5G0488900	SfWRKY39-qF2	GTGCTGATGGCCTAATGAATG
		SfWRKY39-qR2	GGGCTTTGGGAACTGTAATGG
12	Sfla_5G0271300	SfWRKY40-qF1	TCAGCACCAACTGTTACCC
		SfWRKY40-qR1	TAGCCATCTGTTCCACCA
13	Sfla_6G0001700	SfWRKY41-qF1	TTCAAGTGCTCCTATGCC
		SfWRKY41-qR1	TGATGTGCGTGGTTATGC
14	Sfla_6G0457000	SfWRKY44-qF1	TTTTCCCATCTCCTATGCTTG
		SfWRKY44-qR1	CTAATCCAACGGTCGGTGAGT
15	Sfla_6G0577700	SfWRKY50-qF1	GAAGACTGAGGAGGATACGG
		SfWRKY50-qR1	GTTAGGAGTGGCAGGTTGAT
16	Sfla_6G0244600	SfWRKY52-qF2	TTCATCAATGCACTATCACCTCCTT
		SfWRKY52-qR2	TTCCATCCAAGTTCGCTACGC
17	Sfla_7G0370700	SfWRKY55-qF2	TTAGCACTGTAAACTTTCCGAGAC
		SfWRKY55-qR2	AAGGCAAGGTAGTAGAATTAGACG
18	Sfla_7G0545700	SfWRKY62-qF2	TAGGGTGAAGAAAAGAGTTGAGC
		SfWRKY62-qR2	ATTAGCATCGTCACAAGGAGA
19	Sfla_8G0396700	SfWRKY66-qF1	TAATTCCTCCTTCATGTCCACC
		SfWRKY66-qR1	TGTAGCGTCGTGACACCTTTT
20	Sfla_9G0210300	SfWRKY67-qF1	ATCATCATCCTCGCCCTCCTC
		SfWRKY67-qR1	TGGAATCATTGCTGCACTTAGCT
