# Supplementary material for: Genome-wide identification and expression analysis of the WRKY gene family in Sophora flavescens during tissue development and salt stress
Source: Front Plant Sci. 2024 Dec 23;15:1520786. doi: 10.3389/fpls.2024.1520786 (PMC11700743; doi:10.3389/fpls.2024.1520786)
Supplement: Supplementary Table 2 — Detailed information of the S. flavescens WRKY gene family. [file Table2.xlsx]

## Sheet: Sfla
NO.	Gene ID	Protein ID	Gene name	Start	End	Chromosome	Group	Gene length	PI	MW	Protein length
1	Sfla_1G0461500	Sfla_1G0461500	SfWRKY01	28902789	28907341	Chr1	I	4553	7.01	50861.5	460
3	Sfla_1G0607200	Sfla_1G0607200	SfWRKY02	120381111	120385125	Chr1	IIe	4015	5.67	53467	488
4	Sfla_1G0212000	Sfla_1G0212000	SfWRKY03	139358265	139362991	Chr1	I	4727	6.03	79418.4	730
5	Sfla_1G0247600	Sfla_1G0247600	SfWRKY04	173494345	173500927	Chr1	I	6583	6.48	62666.9	576
6	Sfla_1G0365400	Sfla_1G0365400	SfWRKY05	263846451	263848776	Chr1	IIe	2326	4.8	29749	262
7	Sfla_1G0366400	Sfla_1G0366400	SfWRKY06	265318272	265320359	Chr1	IIc	2088	7.2	34978	311
8	Sfla_1G0790500	Sfla_1G0790500	SfWRKY07	267950884	267958693	Chr1	IIb	7810	6.83	49435.9	455
2	N/A	N/A	SfWRKY08	34436180	34436622	Chr2	IIc	443	8.72	16533.2	147
9	Sfla_2G0087400	Sfla_2G0087400	SfWRKY09	41677129	41680063	Chr2	IIb	2935	6.47	64471.5	597
10	Sfla_2G0211200	Sfla_2G0211200	SfWRKY10	109079023	109080732	Chr2	IIe	1710	6.97	42577	386
11	Sfla_2G0290600	Sfla_2G0290600	SfWRKY11	180360601	180362600	Chr2	IIe	2000	7.54	43531.7	393
12	Sfla_2G0721700	Sfla_2G0721700	SfWRKY12	182919525	182924043	Chr2	I	4519	6.44	83500.7	757
13	Sfla_2G0797100	Sfla_2G0797100	SfWRKY13	247129451	247132185	Chr2	III	2735	5.69	34485.3	308
14	Sfla_2G0827800	Sfla_2G0827800	SfWRKY14	269212528	269215344	Chr2	I	2817	7.65	58834.5	535
15	Sfla_2G0408200	Sfla_2G0408200	SfWRKY15	272119264	272121399	Chr2	III	2136	5.93	33222.1	292
16	Sfla_3G0051700	Sfla_3G0051700	SfWRKY16	25101931	25103802	Chr3	IId	1872	9.51	35265	319
17	Sfla_3G0521700	Sfla_3G0521700	SfWRKY17	82774876	82779516	Chr3	I	4641	6.62	54665	499
18	Sfla_3G0647500	Sfla_3G0647500	SfWRKY18	181290301	181293587	Chr3	IId	3287	9.78	35459.3	323
19	Sfla_3G0315800	Sfla_3G0315800	SfWRKY19	206399417	206400862	Chr3	IIe	1446	5.6	34810.2	312
20	Sfla_4G0071700	Sfla_4G0071700	SfWRKY20	57496065	57500731	Chr4	I	4667	8.38	53243.1	490
21	Sfla_4G0460600	Sfla_4G0460600	SfWRKY21	92393088	92394494	Chr4	III	1407	5.24	23885.6	209
22	Sfla_4G0504300	Sfla_4G0504300	SfWRKY22	129504394	129512358	Chr4	IIc	7965	6.51	32655	297
23	Sfla_4G0517900	Sfla_4G0517900	SfWRKY23	136958743	136961236	Chr4	IIb	2494	8.32	52089.8	474
24	Sfla_4G0518300	Sfla_4G0518300	SfWRKY24	137363917	137368216	Chr4	IIb	4300	8.91	53435.8	487
25	Sfla_4G0203400	Sfla_4G0203400	SfWRKY25	154087708	154089315	Chr4	IIe	1608	5.44	35938.7	329
26	Sfla_4G0543900	Sfla_4G0543900	SfWRKY26	156147429	156153046	Chr4	III	5618	5.31	53892.2	477
27	Sfla_4G0585300	Sfla_4G0585300	SfWRKY27	183000731	183007895	Chr4	III	7165	6.76	33082	294
28	Sfla_4G0593600	Sfla_4G0593600	SfWRKY28	187695207	187701066	Chr4	III	5860	6.28	50755.6	445
29	Sfla_4G0593700	Sfla_4G0593700	SfWRKY29	187707380	187710391	Chr4	I	3012	8.93	43809.8	395
30	Sfla_4G0262500	Sfla_4G0262500	SfWRKY30	189133846	189137008	Chr4	I	3163	7.29	62319.2	568
31	Sfla_4G0307700	Sfla_4G0307700	SfWRKY31	213798392	213801528	Chr4	IIc	3137	7.12	35681.1	317
32	Sfla_4G0319700	Sfla_4G0319700	SfWRKY32	220872293	220875230	Chr4	IIb	2938	5.39	46284.6	428
33	Sfla_4G0323300	Sfla_4G0323300	SfWRKY33	222226243	222231738	Chr4	I	5496	6.43	66226.3	611
34	Sfla_4G0667400	Sfla_4G0667400	SfWRKY34	227836564	227840721	Chr4	I	4158	6.35	51751.1	471
35	Sfla_5G0081500	Sfla_5G0081500	SfWRKY35	62377403	62379426	Chr5	IIc	2024	5.77	20935.2	183
36	Sfla_5G0373200	Sfla_5G0373200	SfWRKY36	68076108	68078451	Chr5	IIa	2344	7.07	26109.4	233
37	Sfla_5G0419900	Sfla_5G0419900	SfWRKY37	110652422	110656571	Chr5	IIc	4150	9.03	22515	199
38	Sfla_5G0464900	Sfla_5G0464900	SfWRKY38	142051346	142055298	Chr5	IIe	3953	5.37	28159.1	259
39	Sfla_5G0488900	Sfla_5G0488900	SfWRKY39	156181129	156184246	Chr5	IIb	3118	5.67	63889.8	590
40	Sfla_5G0271300	Sfla_5G0271300	SfWRKY40	190235088	190237251	Chr5	IIa	2164	7.1	32058.7	286
41	Sfla_6G0001700	Sfla_6G0001700	SfWRKY41	649333	651143	Chr6	IIa	1811	8.96	31590.3	281
42	Sfla_6G0025300	Sfla_6G0025300	SfWRKY42	13998857	14001249	Chr6	IIe	2393	8.73	40490.1	354
43	Sfla_6G0417300	Sfla_6G0417300	SfWRKY43	35123991	35125645	Chr6	IId	1655	9.62	34433.2	315
44	Sfla_6G0457000	Sfla_6G0457000	SfWRKY44	59724756	59727124	Chr6	III	2369	5.66	40794	368
45	Sfla_6G0128300	Sfla_6G0128300	SfWRKY45	69133048	69136026	Chr6	III	2979	6.07	36284.6	318
46	Sfla_6G0473900	Sfla_6G0473900	SfWRKY46	69162916	69166182	Chr6	III	3267	5.95	38451.3	345
47	Sfla_6G0479900	Sfla_6G0479900	SfWRKY47	72258704	72261876	Chr6	IIc	3173	7.63	23006.4	200
48	Sfla_6G0135600	Sfla_6G0135600	SfWRKY48	72485815	72490776	Chr6	IIc	4962	9.22	25930.4	232
49	Sfla_6G0196200	Sfla_6G0196200	SfWRKY49	121933559	121936519	Chr6	I	2961	5.63	38112.2	343
50	Sfla_6G0577700	Sfla_6G0577700	SfWRKY50	134845077	134846877	Chr6	IIc	1801	6.54	35954.2	316
51	Sfla_6G0577900	Sfla_6G0577900	SfWRKY51	135049877	135051577	Chr6	IIe	1701	5.31	28477.5	250
52	Sfla_6G0244600	Sfla_6G0244600	SfWRKY52	144916309	144919287	Chr6	IId	2979	9.74	43855.8	391
53	Sfla_7G0026300	Sfla_7G0026300	SfWRKY53	11510832	11512665	Chr7	IIc	1834	5.82	39902.2	359
54	Sfla_7G0344000	Sfla_7G0344000	SfWRKY54	24421617	24427098	Chr7	I	5482	8.6	54858.2	502
55	Sfla_7G0370700	Sfla_7G0370700	SfWRKY55	38502145	38506241	Chr7	IIb	4097	6.45	63551.8	584
56	Sfla_7G0387000	Sfla_7G0387000	SfWRKY56	45756268	45757980	Chr7	IIc	1713	7.02	18761.9	167
57	Sfla_7G0401300	Sfla_7G0401300	SfWRKY57	53460912	53463524	Chr7	IIc	2613	9.24	25377.6	223
58	Sfla_7G0421500	Sfla_7G0421500	SfWRKY58	65750003	65751587	Chr7	IIe	1585	5.73	29169.2	263
59	Sfla_7G0458000	Sfla_7G0458000	SfWRKY59	85858863	85861037	Chr7	IIc	2175	6.7	39474.2	358
60	Sfla_7G0461900	Sfla_7G0461900	SfWRKY60	87771683	87774373	Chr7	IIb	2691	5.4	55747.9	503
61	Sfla_7G0203600	Sfla_7G0203600	SfWRKY61	100784477	100789134	Chr7	I	4658	6.5	59207.1	528
62	Sfla_7G0545700	Sfla_7G0545700	SfWRKY62	155082657	155091877	Chr7	IIc	9221	8.15	26242.8	234
63	Sfla_8G0315400	Sfla_8G0315400	SfWRKY63	69695779	69700558	Chr8	IIb	4780	6.26	56919.8	522
64	Sfla_8G0355600	Sfla_8G0355600	SfWRKY64	101220733	101222654	Chr8	I	1922	6.55	40000.3	361
65	Sfla_8G0378500	Sfla_8G0378500	SfWRKY65	116316433	116323999	Chr8	IIb	7567	6.54	46054.4	418
66	Sfla_8G0396700	Sfla_8G0396700	SfWRKY66	132012141	132014341	Chr8	IId	2201	9.67	35578.1	325
67	Sfla_9G0210300	Sfla_9G0210300	SfWRKY67	5077110	5079618	Chr9	IIa	2509	6.14	30964.8	277
68	Sfla_9G0177900	Sfla_9G0177900	SfWRKY68	130134967	130138637	Chr9	I	3671	8.99	50954.8	462
69	Sfla_9G0399400	Sfla_9G0399400	SfWRKY69	136367831	136371168	Chr9	IId	3338	9.58	38272.4	343

## Sheet: SHH
NO.	Gene ID	Protein ID	Gene name	Start	End	Chromosome	Group	Gene length	PI	MW	Protein length
1	evm.TU.cluster01.340	evm.model.cluster01.340	SmWRKY01	2938597	2939663	cluster01	III	1067	6.31	30485.1	270
2	evm.TU.cluster01.823	evm.model.cluster01.823	SmWRKY02	7545306	7546692	cluster01	IId	1387	9.62	33856.3	308
3	evm.TU.cluster01.3042	evm.model.cluster01.3042	SmWRKY03	26411731	26416065	cluster01	I	4335	6.47	54357.7	496
4	evm.TU.cluster01.8221	evm.model.cluster01.8221	SmWRKY04	69705065	69706710	cluster01	IId	1646	9.71	35776.6	328
5	evm.TU.cluster01.8590	evm.model.cluster01.8590	SmWRKY05	72630131	72630784	cluster01	I	654	6.39	25057.4	217
6	evm.TU.cluster01.9209	evm.model.cluster01.9209	SmWRKY06	78133108	78134514	cluster01	IIe	1407	5.55	32866	293
7	evm.TU.cluster01.9279	evm.model.cluster01.9279	SmWRKY07	78757716	78759012	cluster01	III	1297	5.71	40432.8	357
8	evm.TU.cluster02.1151	evm.model.cluster02.1151	SmWRKY08	9982157	9984946	cluster02	IIb	2790	6.5	65698	606
9	evm.TU.cluster02.1522	evm.model.cluster02.1522	SmWRKY09	13363803	13366557	cluster02	IIe	2755	5.72	54851.4	506
10	evm.TU.cluster02.1609	evm.model.cluster02.1609	SmWRKY10	14131698	14133142	cluster02	IIc	1445	5.89	42444.5	385
11	evm.TU.cluster02.4204	evm.model.cluster02.4204	SmWRKY11	37209824	37216389	cluster02	I	6566	6.64	64104.8	592
12	evm.TU.cluster02.6895	evm.model.cluster02.6895	SmWRKY12	58999758	59003419	cluster02	I	3662	5.89	80692.6	749
13	evm.TU.cluster02.8859	evm.model.cluster02.8859	SmWRKY13	75146632	75149271	cluster02	IIe	2640	4.87	29646.9	261
14	evm.TU.cluster02.8910	evm.model.cluster02.8910	SmWRKY14	75662444	75664117	cluster02	IIc	1674	7.64	35614.5	315
15	evm.TU.cluster02.9043	evm.model.cluster02.9043	SmWRKY15	76726030	76730859	cluster02	IIb	4830	6.89	55334.4	506
16	evm.TU.cluster02.9894	evm.model.cluster02.9894	SmWRKY16	84178584	84180553	cluster02	III	1970	5.06	41479.2	366
17	evm.TU.cluster03.1549	evm.model.cluster03.1549	SmWRKY17	14152207	14153986	cluster03	IId	1780	9.76	39109.4	349
18	evm.TU.cluster03.1880	evm.model.cluster03.1880	SmWRKY18	17204196	17205315	cluster03	IIe	1120	5.2	30058.3	264
19	evm.TU.cluster03.1898	evm.model.cluster03.1898	SmWRKY19	17325839	17327216	cluster03	IIc	1378	6.4	33864.6	296
20	evm.TU.cluster03.2469	evm.model.cluster03.2469	SmWRKY20	22260776	22264264	cluster03	I	3489	5.51	38813.2	353
21	evm.TU.cluster03.5449	evm.model.cluster03.5449	SmWRKY21	47284635	47287980	cluster03	IIb	3346	6.79	60490.9	554
22	evm.TU.cluster03.5837	evm.model.cluster03.5837	SmWRKY22	50453127	50457099	cluster03	I	3973	6.65	52075.9	475
23	evm.TU.cluster04.1612	evm.model.cluster04.1612	SmWRKY23	13543692	13548590	cluster04	I	4899	6.77	57235.2	527
24	evm.TU.cluster04.6518	evm.model.cluster04.6518	SmWRKY24	53510651	53519588	cluster04	IIc	8938	5.94	32947.4	298
25	evm.TU.cluster04.6922	evm.model.cluster04.6922	SmWRKY25	56907609	56916349	cluster04	IIb	8741	6.78	101723	941
26	evm.TU.cluster04.7539	evm.model.cluster04.7539	SmWRKY26	62176585	62178001	cluster04	IIe	1417	5.57	36070.9	331
27	evm.TU.cluster04.7545	evm.model.cluster04.7545	SmWRKY27	62210481	62215745	cluster04	IIc	5265	8.15	35530.4	321
28	evm.TU.cluster04.7654	evm.model.cluster04.7654	SmWRKY28	63057773	63059788	cluster04	III	2016	5.39	41548.4	370
29	evm.TU.cluster04.8481	evm.model.cluster04.8481	SmWRKY29	70367649	70371541	cluster04	III	3893	6.68	39660.7	359
30	evm.TU.cluster04.8482	evm.model.cluster04.8482	SmWRKY30	70373830	70378239	cluster04	III	4410	6.32	29708.2	264
31	evm.TU.cluster04.8484	evm.model.cluster04.8484	SmWRKY31	70390720	70395417	cluster04	III	4698	6.42	33825.8	297
32	evm.TU.cluster04.8647	evm.model.cluster04.8647	SmWRKY32	71785421	71788526	cluster04	III	3106	7.53	45917.4	408
33	evm.TU.cluster04.8648	evm.model.cluster04.8648	SmWRKY33	71791013	71794853	cluster04	IIc	3841	6.71	33304.4	297
34	evm.TU.cluster04.8649	evm.model.cluster04.8649	SmWRKY34	71797803	71800334	cluster04	I	2532	7.74	31547.5	286
35	evm.TU.cluster04.8662	evm.model.cluster04.8662	SmWRKY35	71941619	71947949	cluster04	I	6331	6.27	83185.6	756
36	evm.TU.cluster04.9506	evm.model.cluster04.9506	SmWRKY36	79493864	79495723	cluster04	IIc	1860	6.53	34692.9	306
37	evm.TU.cluster04.9698	evm.model.cluster04.9698	SmWRKY37	81089944	81094020	cluster04	IIb	4077	6.13	52529.9	478
38	evm.TU.cluster04.9743	evm.model.cluster04.9743	SmWRKY38	81553504	81558530	cluster04	I	5027	6.8	58824.2	542
39	evm.TU.cluster04.9903	evm.model.cluster04.9903	SmWRKY39	82825047	82827892	cluster04	I	2846	6.39	50443.6	459
40	evm.TU.cluster05.559	evm.model.cluster05.559	SmWRKY40	4927028	4930002	cluster05	IIb	2975	6.15	70552.4	651
41	evm.TU.cluster05.1049	evm.model.cluster05.1049	SmWRKY41	9306111	9309835	cluster05	IIe	3725	5.46	29012.1	267
42	evm.TU.cluster05.2988	evm.model.cluster05.2988	SmWRKY42	25783204	25785248	cluster05	IIc	2045	9.06	22768.2	201
43	evm.TU.cluster05.6252	evm.model.cluster05.6252	SmWRKY43	51895406	51896955	cluster05	IIa	1550	8.65	32579.8	291
44	evm.TU.cluster05.6289	evm.model.cluster05.6289	SmWRKY44	52120480	52122563	cluster05	IIa	2084	7.04	28953.8	258
45	evm.TU.cluster05.6604	evm.model.cluster05.6604	SmWRKY45	54601846	54603552	cluster05	IIc	1707	5.24	19648.3	170
46	evm.TU.cluster06.774	evm.model.cluster06.774	SmWRKY46	6522651	6528426	cluster06	IIa	5776	8.73	37462.9	333
47	evm.TU.cluster06.982	evm.model.cluster06.982	SmWRKY47	8555603	8557092	cluster06	IId	1490	9.56	35547.3	326
48	evm.TU.cluster06.1958	evm.model.cluster06.1958	SmWRKY48	17194342	17197778	cluster06	III	3437	6.31	44006.1	397
49	evm.TU.cluster06.2415	evm.model.cluster06.2415	SmWRKY49	21166039	21168910	cluster06	III	2872	6.37	35160.2	307
50	evm.TU.cluster06.2416	evm.model.cluster06.2416	SmWRKY50	21172862	21176851	cluster06	III	3990	6.27	38870.8	348
51	evm.TU.cluster06.2559	evm.model.cluster06.2559	SmWRKY51	22442346	22444702	cluster06	IIc	2357	7.73	22704.1	199
52	evm.TU.cluster06.2577	evm.model.cluster06.2577	SmWRKY52	22614079	22617959	cluster06	IIc	3881	9.1	26390.8	237
53	evm.TU.cluster06.5678	evm.model.cluster06.5678	SmWRKY53	48302276	48307912	cluster06	IIb	5637	5.84	60198.7	550
54	evm.TU.cluster06.7224	evm.model.cluster06.7224	SmWRKY54	61313443	61318129	cluster06	I	4687	8.61	57538.4	525
55	evm.TU.cluster06.7664	evm.model.cluster06.7664	SmWRKY55	65080986	65086790	cluster06	IIb	5805	6.7	49795	454
56	evm.TU.cluster06.8179	evm.model.cluster06.8179	SmWRKY56	69391935	69394014	cluster06	IId	2080	9.73	35583.9	325
57	evm.TU.cluster07.1073	evm.model.cluster07.1073	SmWRKY57	8705390	8717752	cluster07	IIa	12363	8.3	39167.3	353
58	evm.TU.cluster07.5948	evm.model.cluster07.5948	SmWRKY58	47836018	47899117	cluster07	III	63100	6.2	32498.4	283
59	evm.TU.cluster07.5970	evm.model.cluster07.5970	SmWRKY59	48030901	48032739	cluster07	III	1839	6.53	34539.8	302
60	evm.TU.cluster07.5984	evm.model.cluster07.5984	SmWRKY60	48147301	48148890	cluster07	III	1590	6.53	32090.8	281
61	evm.TU.cluster07.5985	evm.model.cluster07.5985	SmWRKY61	48158104	48159825	cluster07	III	1722	6.15	30349.2	264
62	evm.TU.cluster07.6953	evm.model.cluster07.6953	SmWRKY62	56986582	56994928	cluster07	I	8347	9.15	94991.4	856
63	evm.TU.cluster07.7166	evm.model.cluster07.7166	SmWRKY63	58821560	58823473	cluster07	IId	1914	9.64	38698	345
64	evm.TU.cluster07.7367	evm.model.cluster07.7367	SmWRKY64	60560063	60563073	cluster07	IIa	3011	9.46	42955.4	382
65	evm.TU.cluster08.1065	evm.model.cluster08.1065	SmWRKY65	8406662	8424328	cluster08	IIc	17667	8.15	26651.3	236
66	evm.TU.cluster08.4648	evm.model.cluster08.4648	SmWRKY66	38700335	38703912	cluster08	I	3578	6.33	56687.1	505
67	evm.TU.cluster08.5314	evm.model.cluster08.5314	SmWRKY67	44561696	44564093	cluster08	IIb	2398	5.96	54664.6	496
68	evm.TU.cluster08.5342	evm.model.cluster08.5342	SmWRKY68	44767900	44770529	cluster08	IIe	2630	6.51	40348.8	365
69	evm.TU.cluster08.5441	evm.model.cluster08.5441	SmWRKY69	45535248	45537099	cluster08	IIc	1852	6.83	37157.7	337
70	evm.TU.cluster08.6150	evm.model.cluster08.6150	SmWRKY70	51836904	51838010	cluster08	IIe	1107	5.73	28007	251
71	evm.TU.cluster08.6470	evm.model.cluster08.6470	SmWRKY71	54587641	54589091	cluster08	IIc	1451	5.94	20642.6	182
72	evm.TU.cluster08.6480	evm.model.cluster08.6480	SmWRKY72	54708828	54710800	cluster08	IIc	1973	8.86	26099.5	227
73	evm.TU.cluster08.7019	evm.model.cluster08.7019	SmWRKY73	59223870	59228667	cluster08	IIb	4798	6.22	63041.8	581
74	evm.TU.cluster08.7496	evm.model.cluster08.7496	SmWRKY74	63612548	63619110	cluster08	I	6563	7.3	55323.6	505
75	evm.TU.cluster08.7979	evm.model.cluster08.7979	SmWRKY75	68183692	68185232	cluster08	IIc	1541	5.66	39025.9	350
76	evm.TU.cluster08.8261	evm.model.cluster08.8261	SmWRKY76	70599871	70602340	cluster08	IIb	2470	6.11	59420.9	547
77	evm.TU.cluster09.901	evm.model.cluster09.901	SmWRKY77	7520355	7521897	cluster09	IIe	1543	5.61	36571.4	333
78	evm.TU.cluster09.1042	evm.model.cluster09.1042	SmWRKY78	8575489	8587379	cluster09	I	11891	5.82	101530	927
79	evm.TU.cluster09.3888	evm.model.cluster09.3888	SmWRKY79	32029850	32032746	cluster09	III	2897	5.86	34640.5	309
80	evm.TU.cluster09.4547	evm.model.cluster09.4547	SmWRKY80	37428829	37431562	cluster09	I	2734	6.53	61934.6	560
81	evm.TU.cluster09.4689	evm.model.cluster09.4689	SmWRKY81	38625545	38627477	cluster09	III	1933	5.9	33118.8	293
82	evm.TU.cluster09.8387	evm.model.cluster09.8387	SmWRKY82	69547118	69548938	cluster09	IIe	1821	7.26	42319.7	384
83	evm.TU.cluster09.10984	evm.model.cluster09.10984	SmWRKY83	91396200	91398492	cluster09	IIb	2293	6.35	65268.3	599
